# Supplementary material
Source: publisher site journal article supplement (https://www.dovepress.com/article/610845)
Supplement: Supplementary file 1 [file 610845%20Supplementary%20Material.docx]

**Appendix 1.** Full Search Strategy

**Appendix 2.** The PRISMA Flow Diagram

**Appendix 3.** Characteristics of the included studies

**Appendix 4.** Quality assessment of the included studies

**Appendix 5.** Detailed Evidence-Certainty Assessment Supporting Table 3

Appendix 1 Full Search Strategy

| Database | | Before deduplication | After deduplication |
| --- | --- | --- | --- |
| English Database | PubMed | 180 | 3905 |
| CINAHL | 371 |
| Embase | 3697 |
| Cochrane | 357 |
| Web of Science | 124 |
| Chinese Database | CNKI | 2 |
| WanFang | 2 |
| VIP | 5 |
| Total | | 4738 |

Pubmed

| # | search 2024/11/12 | Result |
| --- | --- | --- |
| 1 | ("Mental Disorders"[MeSH Terms]) OR ("Psychotic Disorders"[MeSH Terms]) | 1515490 |
| 2 | "Behavior Disorders"[Title/Abstract] OR "Diagnosis, Psychiatric"[Title/Abstract] OR "Mental Disorders, Severe"[Title/Abstract] OR "Mental Illness"[Title/Abstract] OR "Psychiatric Diagnosis"[Title/Abstract] OR "Psychiatric Diseases"[Title/Abstract] OR "Psychiatric Disorders"[Title/Abstract] OR "Psychiatric Illness"[Title/Abstract] OR "Severe mental illness"[Title/Abstract] OR "Psychoses"[Title/Abstract] OR "Psychosis"[Title/Abstract] OR "Psychosis, Brief Reactive"[Title/Abstract] OR "Schizoaffective Disorder"[Title/Abstract] OR "Schizophreniform Disorders"[Title/Abstract] | 163868 |
| 3 | #1 OR #2 | 1563922 |
| 4 | ("Decision Making, Shared"[MeSH Terms])OR ("Share Decision Making "[MeSH Terms])OR ("SDM "[MeSH Terms]) | 2477 |
| 5 | ((Mutual decision making [Title/Abstract]) OR (Shared medical decision making [Title/Abstract])) OR (Participatory decision making [Title/Abstract]) | 387 |
| 6 | #4 OR #5 | 2878 |
| 7 | #3 AND #6 | 180 |

Cochrane library

| # | search 2024/11/12 | Result |
| --- | --- | --- |
| 1 | MeSH descriptor: [Mental Disorders] explode all trees | 109219 |
| 2 | MeSH descriptor: [Psychotic Disorders] explode all trees | 4128 |
| 3 | (”Mental Disorders” OR “Psychotic Disorders” OR “Behavior Disorders“ OR “Diagnosis, Psychiatric” OR “Mental Disorders, Severe” OR “Mental Illness” OR “Psychiatric Diagnosis” OR “Psychiatric Diseases” OR “Psychiatric Disorders” OR “Psychiatric Illness” OR “Severe mental illness” OR “Psychoses” OR “Psychosis” OR “Psychosis, Brief Reactive” OR “Schizoaffective Disorder” OR “Schizophreniform Disorders”):ti,ab,kw | 31784 |
| 4 | MeSH descriptor: [Decision Making, Shared] explode all trees | 206 |
| 5 | (”Share Decision Making” OR “Mutual decision making” OR “Decision aids“ OR “Clinical decision making“ OR “Shared medical decision making“ OR “Participatory decision making“ OR “Patient engagement“ OR “Patient-centered care“):ti,ab,kw | 5098 |
| 6 | #1 OR #2 OR #3 | 124988 |
| 7 | #4 OR #5 | 5098 |
| 8 | #6 AND #7 | 357 |

CINAHL

|  | CINAHL search 2024/11/12 | Result |
| --- | --- | --- |
| S3 | S1 AND S2 | 371 |
| S2 | MH Share Decision Making OR TI ( "Decision Making, Shared" OR “Mutual decision making” OR “Decision aids“ OR “Clinical decision making“ OR “Shared medical decision making“ OR “Participatory decision making“ OR “Patient engagement“ OR “Patient-centered care“ ) OR AB ( "Decision Making, Shared" OR “Mutual decision making” OR “Decision aids“ OR “Clinical decision making“ OR “Shared medical decision making“ OR “Participatory decision making“ OR “Patient engagement“ OR “Patient-centered care“ ) | 23043 |
| S1 | MH ”Mental Disorders” OR MH “Psychotic Disorders” OR TI ( “Behavior Disorders“ OR “Diagnosis, Psychiatric” OR “Mental Disorders, Severe” OR “Mental Illness” OR “Psychiatric Diagnosis” OR “Psychiatric Diseases” OR “Psychiatric Disorders” OR “Psychiatric Illness” OR “Severe mental illness” OR “Psychoses” OR “Psychosis” OR “Psychosis, Brief Reactive” OR “Schizoaffective Disorder” OR “Schizophreniform Disorders” ) OR AB ( “Behavior Disorders“ OR “Diagnosis, Psychiatric” OR “Mental Disorders, Severe” OR “Mental Illness” OR “Psychiatric Diagnosis” OR “Psychiatric Diseases” OR “Psychiatric Disorders” OR “Psychiatric Illness” OR “Severe mental illness” OR “Psychoses” OR “Psychosis” OR “Psychosis, Brief Reactive” OR “Schizoaffective Disorder” OR “Schizophreniform Disorders” ) | 111997 |

Embase

| # | search 2024/11/12 | Result |
| --- | --- | --- |
| 1 | “mental disease”/exp | 3068655 |
| 2 | “mental disorders“:ab,ti OR ”psychotic disorders“:ab,ti OR ”mental disease“:ab,ti | 72830 |
| 3 | “shared decision making“/exp | 18645 |
| 4 | “shared decision making“:ab,ti OR ”decision making,shared“:ab,ti | 22094 |
| 5 | #1 OR #2 | 3074601 |
| 6 | #3 OR #4 | 28839 |
| 7 | #5 AND #6 | 3697 |

Web of science

| # | search 2024/11/13 | Result |
| --- | --- | --- |
| 1 | ((TS=("Mental Disorders" or "Psychotic Disorders")) OR TI=("Behavior Disorders" or "Diagnosis, Psychiatric" or "Mental Disorders, Severe" or "Mental Illness" or "Psychiatric Diagnosis" or "Psychiatric Diseases" or “Psychiatric Disorders” or “Psychiatric Illness” or “Severe mental illness” or “Psychoses” or “Psychosis” or “Psychosis, Brief Reactive” or “Schizoaffective Disorder” or “Schizophreniform Disorders”)) OR AB=(“Behavior Disorders“ or “Diagnosis, Psychiatric” or “Mental Disorders, Severe” or “Mental Illness” or “Psychiatric Diagnosis” or “Psychiatric Diseases” or “Psychiatric Disorders” or “Psychiatric Illness” or “Severe mental illness” or “Psychoses” or “Psychosis” or “Psychosis, Brief Reactive” or “Schizoaffective Disorder” or “Schizophreniform Disorders”) | 221229 |
| 2 | ((TS=(”Decision Making, Shared”)) OR TI=(“Mutual decision making” OR “Decision aids“ OR “Shared medical decision making“ OR “Participatory decision making“ OR “Patient engagement“ )) OR AB=(“Mutual decision making” OR “Decision aids“ OR “Shared medical decision making“ OR “Participatory decision making“ OR “Patient engagement“ ) | 8814 |
| 3 | #1 AND #2 | 124 |

The CNKI/WanFang/VIP databases were searched in Chinese using equivalent terms to the English search; English glosses are shown below:

China national knowledge infrastructure (CNKI)

|  | search 2024/11/12 (English translation version) | Result |
| --- | --- | --- |
| 1 | Subject = Mental disorder + Mental disorder disease + Mental disorder patient + Mental disorder patient + Mental disorder person | 2 |
| 2 | Subject=Shared Decision Making + Shared Decision Making Model + Shared Decision Support + Shared Decision Intervention + Shared Decision Care + Shared Decision Care Model |

WANFANG MED ONLINE

|  | search 2024/11/12 (English translation version) | Result |
| --- | --- | --- |
| 1 | (((subject="Mental disorder OR mental disorder disorder OR mental disorder patient OR mental disorder patient OR mental disorder patient OR mental disorder OR mental disorder""))) AND ((subject=""Shared Decision OR Shared Decision Model OR Shared Decision Support OR Shared Decision Intervention OR Shared Decision Nursing OR Shared Decision Care Model OR Shared Decision Care Model") | 5 |

VIP Database for Chinese Technical Periodicals (VIP)

|  | search 2024/11/12 (English translation version) | Result |
| --- | --- | --- |
| 1 | (((Title or Keywords="mental disorder" OR Title or Keywords="mental disorder disease") OR Title or Keywords="mental disorder patient") OR Title or Keywords="mental disorder patient") AND (((Title or Keywords="decision sharing" OR Title or Keywords="decision sharing model") OR Title or Keywords="decision sharing support") OR Title or Keywords="decision sharing care")) | 2 |

Appendix 2. The PRISMA Flow Diagram

| 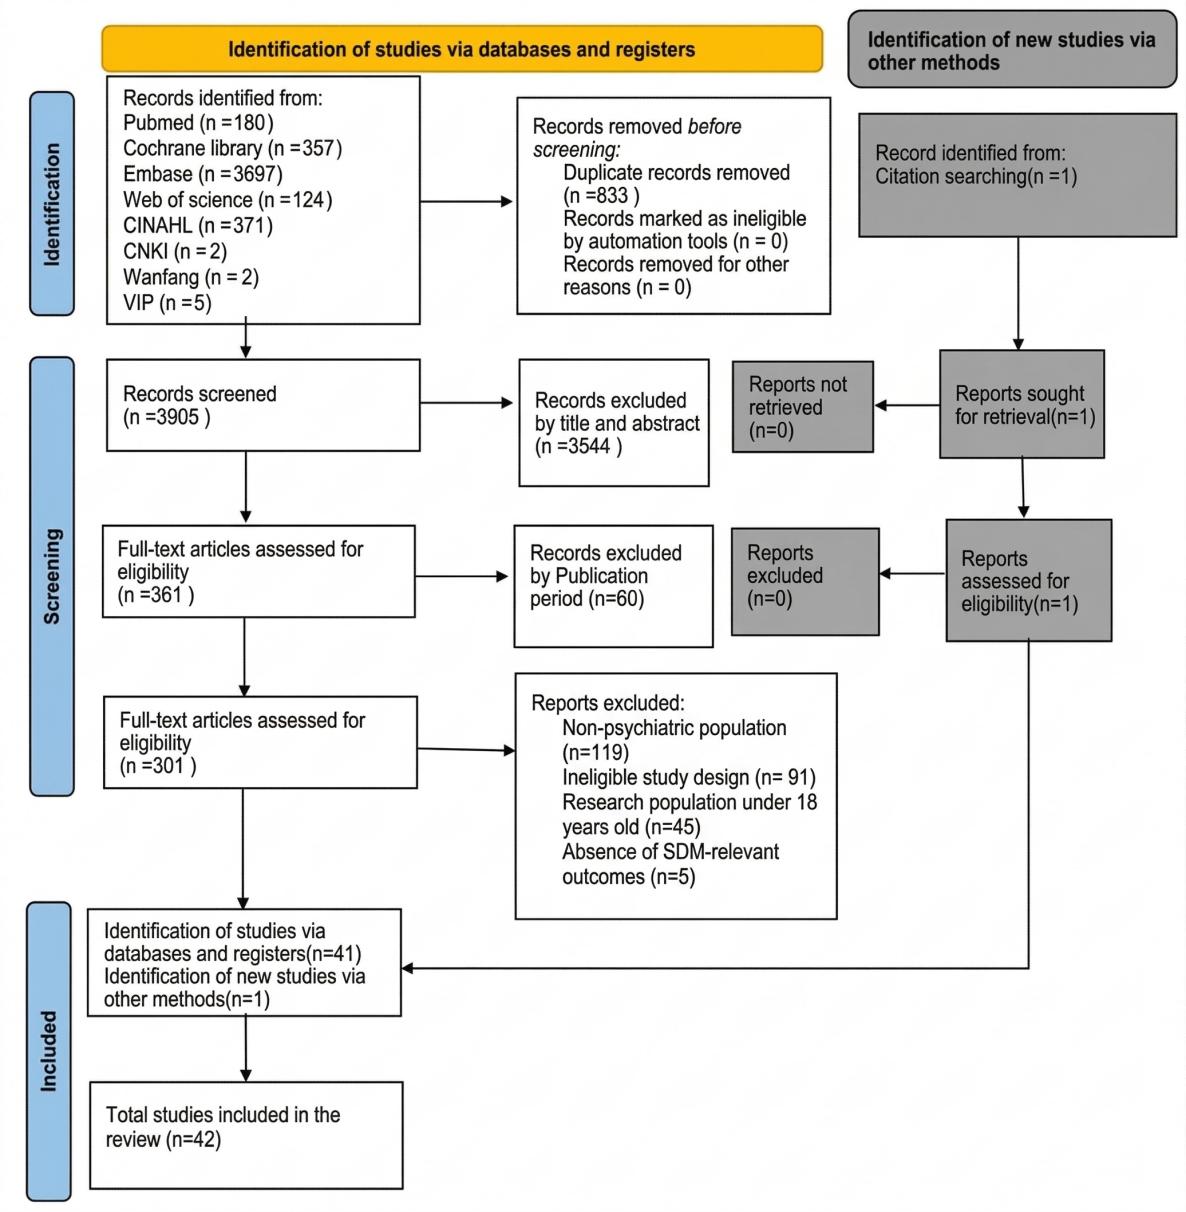 |
| --- |

| Appendix 3. Characteristics of the included studies | | | | | | | | | | | | | |
| --- | --- | --- | --- | --- | --- | --- | --- | --- | --- | --- | --- | --- | --- |
| Author, year | Country | Data Collection Methods | Severe mental illness types | Research Setting | SDM Intervention OR Patient/Physician Decision Support Tools (Pre-Post Visit / Clinical) | Research Methodology | Baseline | | | SDM/DST clinical practice outcomes | | | Quality |
| Age (years) | Male (%) | Sample  Size | Expert Participants | Positive Clinical Practice Outcome | Barriers in clinical practice |
| Martínez et al, 2021 | Spain | Focus Group Discussion | Schizophrenia(48%)  Bipolar disorder(20%)  Major depressive disorder (20%) Others (12%) | Acute and community mental health services | SDM Intervention | Qualitative research | 46.33 ± 11.37 | 19 (76) | 25 | Mental Health Providers&patients | Enhanced the patients adherence & satisfaction | Healthcare professionals show paternalism, bias;  Power imbalance hinders SDM | 10 |
| Aya Ahmed Abousheishaa et al,2022 | Malaysia | Focus Group Discussion;  User Perception Interview (Alpha Test) Scale Assessment (Beta Test) | Major Depressive Disorder | Outpatient Department | Patient Decision Support Tools (Clinical) | Qualitative research | Alpha test: 36.66 Beta test: 34.1±1.28 | Alpha test: 33.3(3)  Beta Test: 30(113) | Alpha test: doctors:385  Beta Test:  Patients;386 | Mental Health Providers&patients | Increased satisfaction;  Improved patient readiness;  No consultation time extension | The tool is localized but cultural/language barriers exist | 8 |
| Vivien Yeo et al, 2021 | Australia | Discrete Selection Experiment (DCE) | Schizophrenia  (63%)  Bipolar disorder (23%)  Others (14%) | Community clinic and inpatient department | SDM Intervention | Quantitative research  ( cross sectional study) | 38.4  (doctors)  39.9  (patients) | 52(27)  (doctors)  51(25)  (patients) | Doctors:52 /patients: 49 | Mental Health Providers&patients | Addressing patient concerns enhances communication ; Aligning treatment with preferences improves adherence and outcomes. | doctors prioritize efficacy over side effects. | 6 |
| Stefanie Becher et al, 2021 | Germany | Face-to-face interviews | Paranoid schizophrenia (72.2%)  schizoaffective disorder (11.1%)  Hebephrenia (16.7%) | Inpatient Department | SDM Intervention | Qualitative research | 25-50  (doctors)  18-65  (patients) | 9(50)  (patients) | Patients:18/doctors:14 | Mental Health Providers&patients | Patient engagement, Physician openness, Staff support & Good environment. | Patient symptoms, Physician attitudes, Resource constraints & Communication gaps. | 10 |
| Farrelly S, Lester H, Rose D et al, 2016 | United Kingdom (UK) | Focus group interview;  Semi-structured interviews | Schizophrenia | Community Mental Health Services | Patient Decision Support Intervention  ( Pre -Post Visit ) | Qualitative research | 39 | 48(24) | Patients:51/Doctors:16 | Mental Health Providers&patients | Enhanced the patients' sense of self-empowerment | Clinician involvement is under-involved and options are limited | 10 |
| Inés Morán-Sánchez et al., 2019 | Spain | Questionnaire and review records | Schizophrenia (76.6%),  Affective disorders  (23.4%) | Outpatient Department | SDM Intervention | Quantitative research  (cross sectional study) | 48.04±12.71 | 99(47.7) | 207 | Mental Health Providers&patients | Enhancing patient engagement and treatment cooperation | Patient preference is negative and information is asymmetrical; Patriarchal decision-making model is deeply rooted | 8 |
| Chong mei Huang et al,2021 | China | Focus group interview;  Semi-structured interviews | Schizophrenia | Inpatient Department | -(Mental Health Providers' views on SDM) | Qualitative research | 26-54  (doctors)  22-43  (nurses) | 6(60)  doctors  8(35)  nurses | Doctors:10/nurses:23 | Psychiatrist& mental health nurse | Reduce medical disputes, improve treatment relationships; | Traditional decision-making model conflicts and consultation time limitations | 10 |
| Carlos De las Cuevas et al,2014a | Spain | Questionnaires | Schizophrenia (18.5%)  - Bipolar disorder (12.2%)  - Depression (47.8%)  - Anxiety disorders (16.5%)  - Personality disorders and others (5.0%) | Community Mental Health Services | SDM Intervention | Quantitative research  (cross sectional study) | 18-87 | 369(37.1) | 967 | Mental Health Providers&patients | Enhanced the patient’s adherence & satisfaction | Patient involvement does not match actual decisions | 8 |
| Laura Kivelitz et al,2018 | Germany | Semi-structured interviews | -Affective Disorders(66.7%)  -Anorexia Nervosa(8.3%)  -Others (15%) | Inpatient Department | -(Patients' views on SDM) | Qualitative research | 26-62 | 13(54.2) | 24 | Patients | Patients want to participate in decision-making, and information helps to participate | Patients with heavy mental burden, insufficient information, limited participation | 8 |
| Carlos De las Cuevas et al,2014b | Spain | Questionnaires | -Schizophrenia (20.0%)  - Bipolar disorder (12.2%)  - Depression (49.8%)  - Others  (17.9%) | Outpatient Department | SDM Intervention | Quantitative research  (cross sectional study) | 18-87 | 301(35.6) | 846 | Mental Health Providers&patients | Patients with positive drug attitudes had a strong sense of decision-making | Patients with schizophrenia have a low sense of participation in decision-making | 8 |
| Andrew Shepherd et al,2014 | United Kingdom | Semi-structured interviews | Schizophrenia | Inpatient and community mental health services | -(Mental Health Providers' views on SDM) | Qualitative research | - | - | Doctors:26 | Psychiatrist | Enhanced the patient’s adherence & satisfaction | Patients are perceived to be impaired and are hindered by multiple external factors (stress, policy, society) | 10 |
| Johannes Hamann et al., 2017 | Germany | Questionnaires;  Clinical records | schizophrenia (69%),  Schizoaffective disorder (26%),  Others (5%) | Emergency Department | SDM Intervention | Quantitative research  (RCT) | 18-65 | 118(55) | 215 | Mental Health Providers&patients | Reducing self-stigma improves patient communication and engagement | Self-stigma, shame, and critical communication inhibit participation in SDM | 10 |
| Alessandro Rodolico et al., 2024 | Italy and Germany | Semi-structured interviews | Schizophrenia Spectrum Disorders | Inpatient and community mental health services | Patient Decision Support Tools (Clinical) | Qualitative research | 32-50  (doctors)  40  (patients) | 16(75)  (patients)  Doctors unclear | Doctors:14/patients: 16 | Mental Health Providers&patients | Enhance patient engagement, autonomy, decision-making, and improved treatment adherence | Conflicting decisions, information overload, and difficulty understanding tool graphics | 10 |
| Yaara Zisman-Ilani et al., 2024 | United States | Questionnaires and interviews | First-Episode Psychosis | Community Mental Health Services | Patient Decision Support Tools (Clinical) | Quantitative research  (RCT) | 18-25 | 12(71) | 17 | Mental Health Providers&patients | Reduce decision-making conflicts and increase satisfaction | The tool does not adequately document the final drug use decision (e.g., whether to continue the drug) | 10 |
| Syahrir Zaini et al., 2018 | Malaysia | Focus group interviews | Major Depressive Disorder | Inpatient Department | -(Patients and Mental Health Providers' views on SDM) | Qualitative research | 40  (patients)  Doctors unclear | 5(54)  (patients)  Doctors unclear | Doctors:19/Patients:11 | Mental Health Providers&patients | Enhanced the patients adherence & satisfaction | Time constraints and cost issues affect decision-making | 9 |
| Johannes Hamann et al., 2016 | Germany | an experimental study involving hypothetical decisions vignettes. | -Schizophrenia (81%) schizoaffective  -Disorder (19%) | Inpatient Department | -(Patients' views on SDM) | Quantitative research  (cross sectional study) | 18-65 | 118(57) | 208 | Mental Health Providers&patients | - | Late-stage recommendations enhance the authority of doctors and influence patient decision-making | 6 |
| Se Youn An et al., 2017 | South Korea | Structured Questionnaire | -Schizophrenia(80%)  Schizoaffective  -Disorder (20%) | Inpatient Department | SDM Intervention | Quantitative research  (Quasi-experimental study) | 19-65 | 60(100) | 60 | Mental Health Providers&patients | Enhanced patients' self-esteem, problem-solving skills, and quality of life | Challenges such as communication skills and emotional barriers in practice affect the actual application effect of SDM | 7 |
| Mediha Younas et al., 2016 | United Kingdom | Semi-structured interviews | Schizophrenia  Bipolar disorder | Mental health pharmacy services | -(Mental Health pharmacists ' views on SDM) | Qualitative research | 30-40  (Pharmacists) | 3(23) | 13 | Mental Health pharmacists | Mental health pharmacists believe that SDM improves patient adherence and treatment satisfaction | Pharmacists indicated that the patient's cognitive impairment and time pressure limited the implementation of SDM | 9 |
| Karina Lovell et al., 2018 | United Kingdom | Questionnaires and interviews | -Schizophrenia (23%), -Bipolar disorder (25%),  -Anxiety (32%),  -Depression (47%),  -Personality disorders (17%),  -Panic disorder (9%),  -Eating disorders (6%),  -Phobias (5%) | Community Mental Health Services | SDM Intervention | Quantitative research  (RCT) | 18-64 | 271(39) | 694 | Mental Health Providers&patients&Caregivers | Patients in the intervention group showed a slight improvement in service satisfaction | SDM integration into mental health care requires a significant investment of resources, and it takes a relatively long time to see significant effects. | 11 |
| Espen W. Haugom et al., 2022 | Norway | Semi-structured interviews | Schizophrenia | Inpatient and Community mental health services | -(Patients' views on SDM) | Qualitative research | 32-72 | 4(40) | 10 | Patients | A few patients have a good collaboration with therapists and adjusted to more suitable treatment plans | Lack of information, difficulty in building trust relationships, and poor patient engagement | 9 |
| Florian Schuster et al., 2021 | Germany | Structured interviews | - Depression (61.7%)  - Schizophrenia or delusional disorder (26.6%)  - Others (11.7%) | Inpatient Department | -(Patients and Caregivers and Mental Health Providers' views on SDM) | Quantitative research  (cross sectional study) | 19-84 | 37(39.4)  (patients)  32(34)  (caregivers) | 94 | Mental Health Providers&patients&Caregivers | Caregiver support can improve treatment, and three parties agree on its role | Caregiver communication is inadequate, expectations are different, and hospital regulations limit participation | 7 |
| Katja Schladitz et al., 2023 | Germany | Semi-structured interviews | -Depression (49%),  -Anxiety disorders (19%),  - Bipolar disorder (14%),  -Schizophrenia (9%),  -Personality disorders (9%) | Self-Help Network and Mental Health Center Recruitment | -(Patients and Caregivers' views on SDM) | Qualitative research | 30-74 | 3(20) | 15 | patients&Caregivers | Patients and caregivers both hope to play a more active role in treatment decisions | Stigma, lack of information, inadequate communication, and structural barriers limit participation | 8 |
| Ingunn Mundal et al., 2021 | Spain | questionnaire | -Depression (39.8%),  -Anxiety Disorders (39.3%),  -Schizophrenia (11.9%),  -Bipolar Disorder (5%),  -Personality Disorders (4%) | Inpatient Department | SDM Intervention | Quantitative research  (cross sectional study) | 18-74 | 85(37.9) | 224 | Mental Health Providers&patients | Most patients prefer collaborative decision-making, and private patients are more positive about medications | Age, education, and health beliefs influence patient decision involvement, with significant differences between public and private environments | 8 |
| Chong mei Huang et al.,2020 | China | Semi-structured interviews | Schizophrenia | Inpatient Department | -(Caregivers' views on SDM) | Qualitative research | 44  (Family caregivers) | 6(40) | 15 | Caregivers | Family involvement improves treatment adherence and patient self-esteem, and promotes social reintegration | Limited treatment options, insufficient information, cultural traditions and social isolation add to stress | 9 |
| Leif I. Solberg et al., 2014 | United States | Telephone interviews | Depressive Disorder | Primary care clinics | SDM Intervention | Quantitative research  (cross sectional study) | 18-65 | 315(27) | 1168 | Mental Health Providers&patients | Enhanced the patients adherence & satisfaction | Age, length of treatment, and health condition limit patient participation | 8 |
| Bradley et al., 2018 | United Kingdom | Open-ended questionnaires | -Schizophrenia,  -Bipolar Disorder,  -Autistic Spectrum | National Medical Services | -(Caregivers' views on SDM) | Qualitative research | 18-80 | 3(34.6) | 101 | Patients&Caregivers | Family involvement improves treatment outcomes and increases patients' sense of identity with treatment | Privacy, inadequate information, and physician dominance limit family participation in decision-making | 8 |
| Takaesu Y et al., 2022 | Japan | Scales and questionnaires | Major Depressive Disorder | Inpatient Department and Outpatient Department | SDM Intervention | Quantitative research  (RCT) | 20-65 | 61(49.2) | 124 | Mental Health Providers&patients | SDM training increased patient engagement and inform, but decision-making conflicts were not reduced | The short-term effect of SDM training is significant, but the long-term effect is poor | 10 |
| Villena-Jimena et al., 2023 | Spain | Focus group interviews and In-depth interviews | -Schizophrenia  (66.7%),  -Schizoaffective disorder  (13.9%),  -Others (19.5%) | University Hospital Mental Health Services | -(Patients' views on SDM) | Qualitative research | 21-68 | 18(50) | 36 | Patients | - | Drug-led treatment, lack of information, and inadequate communication limit patient participation | 8 |
| Johannes Hamann et al., 2017 | Germany | Questionnaire-based surveys, interviews, qualitative focus groups | -Schizophrenia(87%),  -Schizoaffective disorder(13%) | Inpatient Department | SDM-PLUS Intervention | Mixed-Methods Study | 18-65 | - | 276 | Mental Health Providers&patients | SDM-PLUS improves patient decision-making participation and treatment satisfaction, and improves drug compliance | Lack of long-term effects, not sustained after discharge, patient's cognitive impairment affects participation | RCT: 10/13; Qual: 8/10 |
| Natalie J. Maples et al., 2022 | United States | Semi-structured interviews | -Schizophrenia,  -Bipolar Disorder,  -Depression,  -Others | Transitional care clinic | -(Patients and Mental Health Providers' views on SDM) | Qualitative research | 41.2±11.2  (patients)  48.9±9.1  (Healthcare provider) | 4(26.7)  (patients)  4(44.4)  (Healthcare provider) | Patients:15/Healthcare provider: 9 | Mental Health Providers&patients | SDM enhances patient engagement and improves trust and collaboration in care | Inconsistent decision-making preferences, past experience, and cognitive impairment affect SDM participation | 8 |
| Sadaaki Fukui et al., 2014 | United States | Audio recording | -Schizophrenia (56.3%),  -Bipolar disorder (14.1%),  -Major depressive disorder (23.4%),  -Others (6.3%) | Outpatient Department | -(Patients and Mental Health Providers' views on SDM) | Quantitative research  (cross sectional study) | 43.4±10.63 | 84(49.2) | 170 | Mental Health Providers&patients | Patient engagement and decision-making complexity improve SDM levels and consistency | Mental health provider role differences, time constraints, and decision-making simplicity limit SDM | 8 |
| Yumi Aoki et al., 2019 | Japan | Scales and questionnaires | -Bipolar disorder(20%)  -Major depressive disorder (40%)  -Acute and transient psychiatric disorder(10%)  -Others(30%) | Inpatient Department | -(Patients' views on SDM) | Qualitative research | 25-72 | 2(20) | 10 | patients | Patient participation is enhanced, family involvement is enhanced, and decision-making conflicts are reduced | Stigma, inadequate external support, and anxiety affect participation | 8 |
| Ulla-Karin Schön et al., 2018 | Sweden | Semi-structured interviews,  questionnaire | -Schizophrenia,  -Bipolar Disorder,  -Others | Inpatient and community mental health services | -(Mental Health Providers' views on DST) | Mixed-Methods Study | 24-65 | 25(27.1)  ( Psychiatric service staff) | 95 | Mental Health Providers | Tools to increase patient engagement and enhance transparency in treatment communication and decision-making | Lack of time, patient cognitive impairment, and lack of support limit implementation | Quasi: 7/9; Qual: 8/10 |
| Johannes Hamann et al., 2017 | Germany | Questionnaires and scales | Schizophrenia spectrum disorder (38%) ,  affective disorder (62%) | Inpatient Department and Outpatient Department | SDM Intervention | Quantitative research  (cross sectional study) | 43.3±12.9 | 142(43) | 329 | Mental Health Providers&patients | Reduce self-stigma and improve patient engagement and the quality of treatment decisions | Self-stigma and stigma lead to passive communication and dependence on physician decision-making | 8 |
| Johannes Hamann et al., 2016 | Germany | Focus Group Discussion | - Schizophrenia(44%)  - Bipolar disorder(19%)  - Major depressive disorder(37%) | Inpatient Department and Outpatient Department | -(Patients and Mental Health Providers' views on SDM) | Qualitative research | 18-65  (patients)  Doctors  unclear | 8(50)  (patients)  11(65)  (doctors) | Patients:16/Doctors:17 | Mental Health Providers&patients | Active patient participation and feedback significantly contribute to the quality of decision-making and cooperation | Cognitive impairment, severe symptoms, and environmental factors limit patient participation in decision-making | 8 |
| Espen W. Haugom et al., 2023 | Norway | Questionnaire | Schizophrenia spectrum disorder | community mental health services and hospital department | SDM Intervention | Quantitative research  (cross sectional study) | 40±12.6 | 179(59) | 305 | Mental Health Providers&patients | SDM enhances patient involvement in decision-making and overall service satisfaction | SDM score is low, severe illness and mandatory treatment limits participation | 8 |
| Yaara Zisman-Ilani et al., 2016 | Israel | Questionnaire | -Schizophrenia spectrum disorder  (63.4%)  -Affective disorder  (25.7%)  -Others  (10.9%) | Inpatient Department | SDM Intervention | Mixed-Methods Study | 36.54±11.24 | 58(57.4) | 101 | Mental Health Providers&patients | The SDM-Q-9-PSY scale can effectively improve patients' sense of participation in decision-making | Cognitive impairment and environmental factors limit patient participation | RCT: 11/13; Qual: 8/10 |
| Sascha M. Keij et al., 2020 | Netherlands | Semi-structured interviews | - Not specifically categorized | Inpatient Department | -(Patients and Mental Health Providers' views on SDM) | Qualitative research | 38-92  (patients)  37-61  (doctors) | 4(27)  (patients)  9(56)  (doctors) | Patient:15/Doctors:16 | Mental Health Providers&patients | Understanding and communication skills increase patients' motivation to participate in SDM | Health literacy, cultural background, and emotional distress affect patient engagement | 8 |
| Johannes Hamann et al., 2020 | Germany | Questionnaires and scales,  Retrospective analysis | -Schizophrenia,  -Schizoaffective disorder | Inpatient Department | SDM-PLUS Intervention | Mixed-Methods Study | 42±12.9 | 143(47) | 305 | Mental Health Providers&patients | SDM-PLUS improves patient participation in decision-making and medication adherence | The long-term effect is limited, and the inpatient environment and sample loss affect the implementation | RCT: 10/13; Qual: 8/10 |
| Mohamad Ayob Ismail et al., 2021 | Malaysia | Questionnaires and interviews | Schizophrenia | Inpatient Department | -(Patients' views on SDM) | Quantitative research  (cross sectional study) | 44.86±13.86 | 34(39.5) | 86 | Mental Health Providers&patients | SDM enhances patient engagement, with better experiences for young patients and those without using clozapine | Cognitive impairment, cultural factors, and medications limit participation | 8 |
| Huang et al., 2020 | China | Semi-structured interviews | Schizophrenia | Inpatient Department | -(Patients' views on SDM) | Qualitative research | 19-49 | 7(58.3) | 12 | patients | Patients hope to participate more in treatment decisions, with family support facilitating these decisions | Cultural barriers, inadequate communication, and resource limitations affect patient engagement | 10 |
| Joannes W. Renes et al., 2024 | Netherlands | Questionnaires | Bipolar disorder | Outpatient Department | SDM Intervention | Quantitative research  (cross sectional study) | 49.5±11.2 | 284(33.8) | 839 | Mental Health Providers&patients | SDM improves patients' sense of participation in decision-making and increases treatment satisfaction and compliance | Patient decision-making participation is uneven, and the culture and clinical environment influence implementation | 8 |

*Abbreviations: SDM, shared decision-making; DST, decision support tool; RCT, randomized controlled trial. The symbol ± denotes mean ± standard deviation. Percentages in parentheses denote the proportion of the corresponding sample.*

Appendix 4. Quality assessment of the included studies

1.JBI Qualitative Research Quality Evaluation Tool

checklist for analytical qualitative studies

| Title | First Author, Year | Philosophy-Methodology | Methodology-Question | Methods-Data | Data-Analytic | Analysis-Interpretation | Researcher Positioning | Researcher Influence | Participant Voices | Ethical Approval | Conclusions Validity | Score |
| --- | --- | --- | --- | --- | --- | --- | --- | --- | --- | --- | --- | --- |
| *1* | Martínez et al, 2021 | Yes | Yes | Yes | Yes | Yes | Yes | Yes | Yes | Yes | Yes | 10 |
| *2* | Aya Ahmed Abousheishaa et al,2022 | Yes | Yes | Yes | Yes | Yes | Unclear | Unclear | Yes | Yes | Yes | 8 |
| *3* | Stefanie Becher et al, 2021 | Yes | Yes | Yes | Yes | Yes | Yes | Yes | Yes | Yes | Yes | 10 |
| *4* | Farrelly S, Lester H, Rose D et al, 2016 | Yes | Yes | Yes | Yes | Yes | Yes | Yes | Yes | Yes | Yes | 10 |
| *5* | Chong mei Huang,et al,2021 | Yes | Yes | Yes | Yes | Yes | Yes | Yes | Yes | Yes | Yes | 10 |
| *6* | Laura Kivelitz et al., 2018 | Yes | Yes | Yes | Yes | Yes | No | Unclear | Yes | Yes | Yes | 8 |
| *7* | Andrew Shepherd et al,2014 | Yes | Yes | Yes | Yes | Yes | Yes | Yes | Yes | Yes | Yes | 10 |
| *8* | Alessandro Rodolico et al., 2024 | Yes | Yes | Yes | Yes | Yes | Yes | Yes | Yes | Yes | Yes | 10 |
| *9* | Syahrir Zaini et al., 2018 | Yes | Yes | Yes | Yes | Yes | Unclear | Yes | Yes | Yes | Yes | 9 |
| *10* | Espen W. Haugom et al., 2022 | Yes | Yes | Yes | Yes | Yes | Yes | Unclear | Yes | Yes | Yes | 9 |
| *11* | Katja Schladitz et al., 2023 | Yes | Yes | Yes | Yes | Yes | No | Unclear | Yes | Yes | Yes | 8 |
| *12* | Chongmei Huang et al., 2020 | Yes | Yes | Yes | Yes | Yes | Yes | No | Yes | Yes | Yes | 9 |
| *13* | Bradley et al., 2018 | Yes | Yes | Yes | Yes | Yes | No | No | Yes | Yes | Yes | 8 |
| *14* | Villena-Jimena et al., 2023 | Yes | Yes | Yes | Yes | Yes | No | No | Yes | Yes | Yes | 8 |
| *15* | Mediha Younas et al., 2016 | Yes | Yes | Yes | Yes | Yes | Yes | No | Yes | Yes | Yes | 9 |
| *16* | Natalie J. Maples et al., 2022 | Yes | Yes | Yes | Yes | Yes | No | No | Yes | Yes | Yes | 8 |
| *17* | Johannes Hamann et al., 2017 | Yes | Yes | Yes | Yes | Yes | Unclear | Unclear | Yes | Yes | Yes | 8 |
| *18* | Yumi Aoki et al., 2019 | Yes | Yes | Yes | Yes | Yes | Unclear | No | Yes | Yes | Yes | 8 |
| *19* | Yaara Zisman-Ilani et al., 2019 | Yes | Yes | Yes | Yes | Yes | No | No | Yes | Yes | Yes | 8 |
| *20* | Johannes Hamann et al., 2020 | Yes | Yes | Yes | Yes | Yes | No | No | Yes | Yes | Yes | 8 |
| *21* | Johannes Hamann et al., 2016 | Yes | Yes | Yes | Yes | Yes | No | No | Yes | Yes | Yes | 8 |
| *22* | Sascha M. Keij et al., 2020 | Yes | Yes | Yes | Yes | Yes | No | No | Yes | Yes | Yes | 8 |
| *23* | Huang et al., 2020 | Yes | Yes | Yes | Yes | Yes | Yes | Yes | Yes | Yes | Yes | 10 |
| *24* | Ulla-Karin Schön et al., 2018 | Yes | Yes | Yes | Yes | Yes | No | No | Yes | Yes | Yes | 8 |

*Column headings (JBI Critical Appraisal Checklist for Qualitative Research): Philosophy-Methodology = congruity between the stated philosophical perspective and the methodology; Methodology-Question = congruity between methodology and the research question/objectives; Methods-Data = congruity between methodology and data-collection methods; Data-Analytic = congruity between methodology and the representation and analysis of data; Analysis-Interpretation = congruity between methodology and the interpretation of results; Researcher Positioning = a statement locating the researcher culturally/theoretically; Researcher Influence = the influence of the researcher on the research, and vice versa, is addressed; Participant Voices = participants and their voices are adequately represented; Ethical Approval = the research is ethical / there is evidence of ethical approval; Conclusions Validity = the conclusions flow from the analysis or interpretation of the data. Score = number of items rated ‘Yes’ (maximum 10).*

*Note: The title corresponding to the number*

*1.A qualitative emancipatory inquiry into relationships between people with mental disorders and health professionals*

*2.Antidepressant decision aid for major depressive disorder patients (ADAM): Development and pilot testing*

*3.Barriers and facilitators of shared decision making in acutely ill inpatients with schizophrenia—Qualitative findings from the intervention group of a randomized‐controlled trial*

*4. Barriers to shared decision making in mental health care: qualitative study of the Joint Crisis Plan for psychosis*

*5. Chinese mental health professionals’ perceptions of shared decision-making regarding people diagnosed with schizophrenia: A qualitative study*

*6.* *Choosing the appropriate treatment setting: which information and decision-making needs do adult inpatients with mental disorders have? A qualitative interview study*

*7. Consultant psychiatrists’ experiences of and attitudes towards shared decision making in antipsychotic prescribing, a qualitative study*

*8. Developing STEP‐SE: A Qualitative Usability Study of a Novel Patient‐Reported Outcomes Tool for Managing Side Effects in Shared Decision‐Making for Schizophrenia Spectrum Disorder Care*

*9. Development of a Strategic Tool for Shared Decision-Making in the Use of Antidepressants among Patients with Major Depressive Disorder: A Focus Group Study*

*10. Experiences of shared decision making among patients with psychotic disorders in Norway: a qualitative study*

*11.Experiencing (Shared) Decision Making: Results from a Qualitative Study of People with Mental Illness and Their Family Members*

*12.* *Feeling responsible: Family caregivers’ attitudes and experiences of shared decision-making regarding people diagnosed with schizophrenia: A qualitative study*

*13.* *Involved, inputting or informing: “Shared” decision making in adult mental health care*

*14.* *“It’s That They Treated Me Like an Object”: A Qualitative Study on the Participation of People Diagnosed with Psychotic Disorders in Their Health Care*

*15.* *Mental health pharmacists views on shared decision-making for antipsychotics in serious mental illness*

*16.* *Perspectives of Patients and Providers in Using Shared Decision Making in Psychiatry*

*17. Implementing shared decision-making on acute psychiatric wards: a cluster-randomized trial with inpatients suffering from schizophrenia (SDM-PLUS)(Qualitative research section)*

*18. Psychiatric outpatients ‘experiences with shared decision-making: a qualitative descriptive study*

*19.* *Shared Decision Making During Active Psychiatric Hospitalization: Assessment and Psychometric Properties(Qualitative research section)*

*20. Shared decision making, aggression, and coercion in inpatients with schizophrenia(Qualitative research section)*

*21. What can patients do to facilitate shared decision making? A qualitative study of patients with depression or schizophrenia and psychiatrists*

*22. What makes a patient ready for Shared Decision Making? A qualitative study*

*23. I am the person who knows myself best: Perception on shared decision‐making among hospitalized people diagnosed with schizophrenia in China*

*24. Psychiatric service staff perceptions of implementing a shared decision-making tool: a process evaluation study(Qualitative research section)*

2.JBI Quantitative Research Quality Evaluation Tool

checklist for analytical cross-sectional studies

| Title | First Author, Year | Inclusion Criteria | Setting Description | Exposure Measurement | Outcome Measurement | Confounders Identified | Confounders Controlled | Outcomes Valid | Statistical Analysis | Score |
| --- | --- | --- | --- | --- | --- | --- | --- | --- | --- | --- |
| *1* | Vivien Yeo et al, 2021 | Yes | Yes | Yes | Yes | No | No | Yes | Yes | 6 |
| *2* | Johannes Hamann et al., 2016 | Yes | Yes | Yes | Yes | Unclear | Unclear | Yes | Yes | 6 |
| *3* | Ingunn Mundal et al., 2021 | Yes | Yes | Yes | Yes | Yes | Yes | Yes | Yes | 8 |
| *4* | Leif I. Solberg et al., 2014 | Yes | Yes | Yes | Yes | Yes | Yes | Yes | Yes | 8 |
| *5* | Sadaaki Fukui et al., 2014 | Yes | Yes | Yes | Yes | Yes | Yes | Yes | Yes | 8 |
| *6* | Mohamad Ayob Ismail et al., 2021 | Yes | Yes | Yes | Yes | Yes | Yes | Yes | Yes | 8 |
| *7* | Joannes W. Renes et al., 2024 | Yes | Yes | Yes | Yes | Yes | Yes | Yes | Yes | 8 |
| *8* | Inés Morán-Sánchez et al., 2019 | Yes | Yes | Yes | Yes | Yes | Yes | Yes | Yes | 8 |
| *9* | Carlos De las Cuevas et al,2021 | Yes | Yes | Yes | Yes | Yes | Yes | Yes | Yes | 8 |
| *10* | Carlos De las Cuevas et al,2014 | Yes | Yes | Yes | Yes | Yes | Yes | Yes | Yes | 8 |
| *11* | Florian Schuster et al., 2021 | Yes | Yes | Yes | Yes | Yes | No | Yes | Yes | 7 |
| *12* | Espen W. Haugom et al., 2023 | Yes | Yes | Yes | Yes | Yes | Yes | Yes | Yes | 8 |
| *13* | Johannes Hamann et al., 2017 | Yes | Ye | Yes | Yes | Yes | Yes | Yes | Yes | 8 |

*Column headings (JBI Critical Appraisal Checklist for Analytical Cross-Sectional Studies): Inclusion Criteria = criteria for inclusion in the sample clearly defined; Setting Description = study subjects and setting described in detail; Exposure Measurement = exposure measured in a valid and reliable way; Outcome Measurement = objective, standard criteria used to measure the condition; Confounders Identified = confounding factors identified; Confounders Controlled = strategies to deal with confounding factors stated; Outcomes Valid = outcomes measured in a valid and reliable way; Statistical Analysis = appropriate statistical analysis used. Score = number of items rated ‘Yes’ (maximum 8).*

*Note: The title corresponding to the number*

*1.Antipsychotic choice: understanding shared decision-making among doctors and patients*

*2.Does it matter whether physicians’recommendations are given early or latein the decision-making process? Anexperimental study among patients with schizophrenia*

*3.Exploring patterns in psychiatric outpatients’preferences for involvement in decision-making: a latent class analysis approach*

*4.* *How Much Shared Decision Making Occurs in Usual Primary Care of Depression?*

*5. Predictors of Shared Decision Making and Level of Agreement between Consumers and Providers in Psychiatric Care*

*6. Shared Decision-Making and Role Preference Among Patients with Schizophrenia in Malaysia: A Cross-Sectional Study*

*7. Shared decision-making in the treatment of bipolar disorder: findings from a nationwide naturalistic cohort study in everyday clinical practice*

*8.* *Shared decision‐making in outpatients with mental disorders: Patients´ preferences and associated factors*

*9.* *To what extent is treatment adherence of psychiatric patients influenced by their participation in shared decision making?*

*10.* *To what extent psychiatric patients feel involved in decision making about their mental health care? Relationships with socio-demographic, clinical, and psychological variables*

*11. ‘Triadic’ shared decision making in mental health: Experiences and expectations of service users, caregivers and clinicians in Germany*

*12.* *Shared decision making and associated factors among patients with psychotic disorders: a cross-sectional study*

*13. Self-Stigma and Consumer Participation in Shared Decision Making in Mental Health Services*

3. JBI Quasi-experimental Research Quality Evaluation Tool

checklists for quasi-experimental studies

| Title | First Author, Year | Cause-Effect Clarity | Control Group | Participant Similarity | Treatment Similarity | Multiple Measures | Outcome Consistency | Outcome Reliability | Follow-up Complete | | Statistical Analysis | Score |
| --- | --- | --- | --- | --- | --- | --- | --- | --- | --- | --- | --- | --- |
| *1* | Se Youn An et al., 2017 | Yes | Yes | No | Yes | Yes | Yes | Yes | | Unclear | Yes | 7 |
| *2* | Ulla-Karin Schön et al., 2018 | Yes | No | Yes | Yes | Yes | Yes | Yes | | No | Yes | 7 |

*Column headings (JBI Critical Appraisal Checklist for Quasi-Experimental Studies): Cause-Effect Clarity = it is clear what is the ‘cause’ and what is the ‘effect’ (no confusion about which variable comes first); Control Group = a control group was present; Participant Similarity = participants in comparisons were similar; Treatment Similarity = participants received similar treatment/care other than the intervention of interest; Multiple Measures = multiple outcome measurements taken pre and post intervention; Outcome Consistency = outcomes measured in the same way across comparisons; Outcome Reliability = outcomes measured in a reliable way; Follow-up Complete = follow-up complete, or differences in follow-up described and analysed; Statistical Analysis = appropriate statistical analysis used. Score = number of items rated ‘Yes’ (maximum 9).*

*Note: The title corresponding to the number*

*1.Effectiveness of Shared Decision-Making Training Program in People With Schizophrenia in South Korea*

*2.Psychiatric service staff perceptions of implementing a shared decision-making tool: a process evaluation study(Quantitative research section)*

4. JBI Randomized controlled trials Research Quality Evaluation Tool

critical appraisal tool for assessment of risk of bias for randomized controlled trials

| Title | First Author, Year | True Randomisation | Allocation Concealment | Baseline Similarity | Participant Blinding | Deliverer Blinding | Treatment Identity | Assessor Blinding | Outcome Measurement | Outcome Reliability | Follow-up Complete | ITT Analysis | Statistical Analysis | Design Appropriate | Score |
| --- | --- | --- | --- | --- | --- | --- | --- | --- | --- | --- | --- | --- | --- | --- | --- |
| *1* | Karina Lovell et al., 2018 | Yes | Yes | Yes | No | No | Yes | Yes | Yes | Yes | Yes | Yes | Yes | Yes | 11 |
| *2* | Takaesu Y et al., 2022 | Yes | Yes | Yes | Unclear | Unclear | Yes | Unclear | Yes | Yes | Yes | Yes | Yes | yes | 10 |
| *3* | Johannes Hamann et al., 2017 | Yes | Yes | Yes | No | No | Yes | Unclear | Yes | Yes | Yes | Yes | Yes | Yes | 10 |
| *4* | Yaara Zisman-Ilani et al., 2019 | Yes | Yes | Yes | No | No | Yes | Yes | Yes | Yes | Yes | Yes | Yes | Yes | 11 |
| *5* | Johannes Hamann et al., 2020 | Yes | Yes | Unclear | No | No | Yes | Yes | Yes | Yes | Yes | Yes | Yes | Yes | 10 |
| *6* | Johannes Hamann et al., 2017 | Yes | Yes | Yes | No | No | Yes | Yes | Yes | Yes | No | Yes | Yes | Yes | 10 |
| *7* | Yaara Zisman-Ilani et al., 2024 | Yes | Yes | Yes | No | No | Yes | Yes | Yes | Yes | No | Yes | Yes | Yes | 10 |

*Column headings (JBI Critical Appraisal Checklist for Randomized Controlled Trials): True Randomisation = true randomization used to assign participants to groups; Allocation Concealment = allocation to groups concealed; Baseline Similarity = groups similar at baseline; Participant Blinding = participants blind to assignment; Deliverer Blinding = those delivering treatment blind to assignment; Treatment Identity = groups treated identically other than the intervention of interest; Assessor Blinding = outcome assessors blind to assignment; Outcome Measurement = outcomes measured in the same way across groups; Outcome Reliability = outcomes measured in a reliable way; Follow-up Complete = follow-up complete, or differences in follow-up described and analysed; ITT Analysis = participants analysed in the groups to which they were randomized; Statistical Analysis = appropriate statistical analysis used; Design Appropriate = trial design appropriate and any deviations from standard RCT design accounted for. Score = number of items rated ‘Yes’ (maximum 13).*

*Note: The title corresponding to the number*

*1.Embedding shared decision-making in the care of patients with severe and enduring mental health problems: The EQUIP pragmatic cluster randomized trial*

*2. Implementation of a shared decision-making training program for clinicians based on the major depressive disorder guidelines in Japan: A multi-center cluster randomized trial*

*3. Implementing shared decision-making on acute psychiatric wards: a cluster-randomized trial with inpatients suffering from schizophrenia (SDM-PLUS)(Quantitative research section)*

*4. Shared Decision Making During Active Psychiatric Hospitalization: Assessment and Psychometric Properties(Quantitative research section)*

*5. Shared decision making, aggression, and coercion in inpatients with schizophrenia(Quantitative research section)*

*6. Training patients with schizophrenia to share decisions with their psychiatrists: a randomized-controlled trial*

*7. Usability and Feasibility of the Antipsychotic Medication Decision Aid in a Community Program for First-Episode Psychosis*

Appendix 5. Detailed Evidence-Certainty Assessment Supporting Table 3

Detailed Evidence Base, Mixed/Null Evidence, and Evidence-Certainty Ratings (GRADE-CERQual) Supporting Table 3 of the Main Manuscript

| Thematic finding | Evidence base (key studies; design; n) | Main direction of evidence | Mixed/null or limiting evidence | Certainty | Rationale for rating |
| --- | --- | --- | --- | --- | --- |
| 1. Patient decision aids (PtDAs) may improve proximal decision quality | Abousheishaa 2022; Rodolico 2024; Zisman-Ilani 2024; Farrelly 2016.  1 pilot RCT + 3 qualitative usability/development studies.  n = 885 (aggregate participant-level). | • Reduced decisional conflict, improved readiness, satisfaction, autonomy, and/or engagement across PtDA studies.  • Abousheishaa reported no consultation-time extension.  • Zisman-Ilani 2024 reported reduced decisional conflict in first-episode psychosis (n=17). | • Effectiveness evidence based on one small pilot RCT (n=17); other studies were tool-development or usability studies rather than full effectiveness trials.  • Outcomes and settings were heterogeneous; long-term clinical outcomes were rarely assessed.  • Independent replication beyond development teams remains limited. | Hybrid GRADE-CERQual:  Moderate | Coherent direction across studies, with moderate qualitative adequacy and relevance.  Downgraded for imprecision, indirectness/outcome heterogeneity, and limited independent replication beyond development settings. |
| 2. Clinician training and SDM interventions may improve short-term engagement, but durability is less consistent without structural support | Lovell 2018 (EQUIP); Takaesu 2022; Hamann 2017 (SDM-PLUS); Hamann 2020; Schön 2018; An 2017; Hamann 2017 patient training; 3 of the review’s 4 stand-alone RCTs (the training/intervention trials; the fourth, a PtDA trial, informs Finding 1) + 3 mixed-methods studies with RCT components + 1 quasi-experimental study + 1 process evaluation.  Zisman-Ilani 2016.  n = 1,870 (aggregate). | • Controlled and quasi-experimental studies reported short-term gains in engagement, information sharing, decision participation, satisfaction, and/or medication-related outcomes.  • Process evaluations suggested improved transparency and bidirectional communication. | • EQUIP was acceptable and well attended but showed no significant effect on autonomy support at 6 months.  • Hamann patient training did not improve long-term adherence at 6–12 months.  • Takaesu showed short-term gains but did not sustain decisional-conflict reductions over time. | GRADE:  Moderate (short-term)  Low (sustained) | Downgraded for limited blinding in behavioral trials, heterogeneous instruments and settings, indirectness across different SDM components, and imprecision/attrition in longer follow-up.  Publication bias could not be excluded. |
| 3. Triadic and family-mediated decision-making is a prominent context in East and Southeast Asian psychiatric SDM | Huang 2021; Huang 2020 caregivers; Huang 2020 patients; Aoki 2019; Ismail 2021; Zaini 2018; Abousheishaa 2022; An 2017; Takaesu 2022.  6 qualitative + 2 quantitative (1 RCT, 1 cross-sectional) + 1 quasi-experimental.  n = 1,141 (aggregate). | • Substantial family involvement repeatedly reported across Chinese, Japanese, Korean, and Malaysian cohorts.  • Family support was associated with improved adherence, self-esteem, readiness, and participation.  • Cultural traditions often functioned as implementation conditions rather than barriers alone. | • Family involvement may create autonomy–surrogate tension when patient and family preferences diverge.  • Evidence is concentrated in East and Southeast Asia and may not transfer to other cultural or legal contexts.  • Most evidence is qualitative or observational. | CERQual:  High (contextual presence)  Moderate (implementation effects) | High coherence, adequate qualitative data, and strong contextual relevance.  Implementation implications rated more cautiously because autonomy conflicts, legal safeguards, and generalizability beyond included settings require further testing. |
| 4. Clinicians and patients appear to weight treatment priorities differently (provider–patient utility misalignment) | Yeo 2021; Hamann 2016 vignette; Morán-Sánchez 2019; Martínez 2021; Villena-Jimena 2023; Maples 2022; Becher 2021.  1 discrete-choice experiment + 1 experimental vignette + 1 cross-sectional + 4 qualitative.  n = 633 (aggregate). | • The DCE (Yeo 2021) showed clinicians weighted efficacy more strongly than patients, whereas patients gave greater weight to tolerability and acceptability.  • Vignette study showed clinician recommendations influenced patient choice.  • Qualitative studies described drug-led care and professional dominance. | • Preference-elicitation methods varied across studies.  • Observational and qualitative evidence cannot establish downstream clinical effects.  • Heuristic mechanisms interpreted as plausible explanations but not directly tested in most included studies.  • No adequately powered trial tested alignment interventions. | Hybrid GRADE-CERQual:  Moderate | Cross-method triangulation across four countries strengthens confidence.  Downgraded for indirectness, heterogeneous elicitation methods, and lack of adequately powered intervention trials testing whether preference alignment improves outcomes. |
| 5. Perceived time burden may exceed measured consultation-time burden ("time illusion") | Abousheishaa 2022; Zaini 2018; Huang 2021; Schön 2018.  3 qualitative/development findings + 1 mixed-methods process evaluation; n = 929.  External benchmark: Stacey et al. 2024 Cochrane PtDA review (209 trials, not included in this review). | • Within-review studies commonly reported time pressure as an implementation barrier.  • Abousheishaa reported no consultation-time extension after PtDA introduction.  • External Cochrane PtDA review suggests minimal average consultation-time extension. | • Direct within-review duration evidence comes mainly from one study.  • Perceived time burden and measured consultation duration were derived from different evidence streams.  • The Cochrane estimate is external to this review and is not psychiatry-specific pooled evidence. | Within-review CERQual:  Low  External GRADE benchmark:  High | Within-review certainty downgraded for indirectness and limited data adequacy.  External Cochrane benchmark is methodologically strong but should be interpreted as contextual support, not as pooled evidence from the 42 included studies. |

*Note:* Quantitative intervention findings were rated using the GRADE framework across five domains (risk of bias, inconsistency, indirectness, imprecision, and publication bias). Qualitative and implementation findings were rated using the CERQual framework across four domains (methodological limitations, coherence, data adequacy, and relevance). Hybrid ratings denote thematic claims for which quantitative and qualitative evidence streams were integrated. Aggregate participant-level totals (n) reflect the sum of supporting studies within each theme; several studies contribute to more than one theme and are therefore counted in multiple rows in keeping with the thematic synthesis approach described in the Methods (study-level participant data are provided in Appendix 3). Risk of bias for individual studies was independently assessed using design-specific Joanna Briggs Institute appraisal tools (see Methods and Appendix 4); within this table, downgrading refers to lowering the confidence rating for a synthesized thematic claim and is reported separately from individual-study quality. The Cochrane systematic review of patient decision aids referenced as external benchmark in Row 5 is reported for contextual support and is not included among the 42 primary studies synthesized in this review.

*Abbreviations:* CERQual, Confidence in the Evidence from Reviews of Qualitative Research; DCE, discrete-choice experiment; EQUIP, Enhancing the Quality of User-Involved Care Planning; GRADE, Grading of Recommendations Assessment, Development and Evaluation; JBI, Joanna Briggs Institute; PtDA, patient decision aid; RCT, randomized controlled trial; SDM, shared decision-making; SDM-PLUS, Shared Decision Making Plus intervention.
